# Supplementary material
Source: publisher figshare collection journal article supplement (https://acs.figshare.com/ndownloader/files/5132494)
Supplement: Supplementary file 1 [file 5132494]

  
data_apr22m 
  
_audit_creation_method            SHELXL-97 
_chemical_name_systematic 
;
4-iodobenzoic acid
;
_chemical_name_common             ?
_chemical_melting_point           '543-545K'
_chemical_formula_moiety          'C7 H5 I O2'
_chemical_formula_sum 
 'C7 H5 I O2' 
_chemical_formula_weight          248.01 
  
loop_ 
 _atom_type_symbol 
 _atom_type_description 
 _atom_type_scat_dispersion_real 
 _atom_type_scat_dispersion_imag 
 _atom_type_scat_source 
 'C'  'C'   0.0033   0.0016 
 'International Tables Vol C Tables 4.2.6.8 and 6.1.1.4' 
 'H'  'H'   0.0000   0.0000 
 'International Tables Vol C Tables 4.2.6.8 and 6.1.1.4' 
 'O'  'O'   0.0106   0.0060 
 'International Tables Vol C Tables 4.2.6.8 and 6.1.1.4' 
 'I'  'I'  -0.4742   1.8119 
 'International Tables Vol C Tables 4.2.6.8 and 6.1.1.4' 
  
_symmetry_cell_setting            'Monoclinic' 
_symmetry_space_group_name_H-M    'P 21/n' 
  
loop_ 
 _symmetry_equiv_pos_as_xyz 
 'x, y, z' 
 '-x+1/2, y+1/2, -z+1/2' 
 '-x, -y, -z' 
 'x-1/2, -y-1/2, z-1/2' 
  
_cell_length_a                    4.0688(10) 
_cell_length_b                    5.9466(15) 
_cell_length_c                    30.253(8) 
_cell_angle_alpha                 90.00 
_cell_angle_beta                  90.982(4) 
_cell_angle_gamma                 90.00 
_cell_volume                      731.9(3) 
_cell_formula_units_Z             4 
_cell_measurement_temperature     123(2) 
_cell_measurement_reflns_used     5974
_cell_measurement_theta_min       1.35
_cell_measurement_theta_max       28.28
  
_exptl_crystal_description        fragment 
_exptl_crystal_colour             colorless 
_exptl_crystal_size_max           0.21 
_exptl_crystal_size_mid           0.20 
_exptl_crystal_size_min           0.13 
_exptl_crystal_density_meas       'not measured' 
_exptl_crystal_density_diffrn     2.251 
_exptl_crystal_density_method     'not measured' 
_exptl_crystal_F_000              464 
_exptl_absorpt_coefficient_mu     4.306 
_exptl_absorpt_correction_type    'multi-scan'
_exptl_absorpt_correction_t_min   0.432
_exptl_absorpt_correction_t_max   0.571
_exptl_absorpt_process_details    '(SADABS; Sheldrick, 1996)' 
  
_exptl_special_details 
; 
 ? 
; 
  
_diffrn_ambient_temperature       123(2) 
_diffrn_radiation_wavelength      0.71073 
_diffrn_radiation_type            MoK\a 
_diffrn_radiation_source          'fine-focus sealed tube' 
_diffrn_radiation_monochromator   graphite 
_diffrn_measurement_device_type   'Bruker AXS CCD'
_diffrn_measurement_method        'phi and omega scans' 
_diffrn_detector_area_resol_mean  'not measured'
_diffrn_standards_number          '0' 
_diffrn_standards_interval_count  ? 
_diffrn_standards_interval_time   ?  
_diffrn_standards_decay_%         ?
_diffrn_reflns_number             6704 
_diffrn_reflns_av_R_equivalents   0.0267 
_diffrn_reflns_av_sigmaI/netI     0.0222 
_diffrn_reflns_limit_h_min        -5 
_diffrn_reflns_limit_h_max        5 
_diffrn_reflns_limit_k_min        -7 
_diffrn_reflns_limit_k_max        7 
_diffrn_reflns_limit_l_min        -39 
_diffrn_reflns_limit_l_max        40 
_diffrn_reflns_theta_min          1.35 
_diffrn_reflns_theta_max          28.28 
_reflns_number_total              1755 
_reflns_number_gt                 1714 
_reflns_threshold_expression      I>2\s(I) 
 
_computing_data_collection        'SMART (Bruker 1997)'
_computing_cell_refinement        'SAINT (Bruker 1997)'
_computing_data_reduction         'SAINT (Bruker 1997)'
_computing_structure_solution     'SHELX-97 (Sheldrick, 1997)' 
_computing_structure_refinement   'SHELX-97 (Sheldrick, 1997)' 
_computing_molecular_graphics     'SHELXTL (Sheldrick, 1997)'
_computing_publication_material   'SHELXTL (Sheldrick, 1997)'
  
_refine_special_details 
; 
 Refinement of F^2^ against ALL reflections.  The weighted R-factor wR and 
 goodness of fit S are based on F^2^, conventional R-factors R are based 
 on F, with F set to zero for negative F^2^. The threshold expression of 
 F^2^ > 2sigma(F^2^) is used only for calculating R-factors(gt) etc. and is 
 not relevant to the choice of reflections for refinement.  R-factors based 
 on F^2^ are statistically about twice as large as those based on F, and R- 
 factors based on ALL data will be even larger. 
; 
  
_refine_ls_structure_factor_coef  Fsqd 
_refine_ls_matrix_type            full 
_refine_ls_weighting_scheme       calc 
_refine_ls_weighting_details 
 'calc w=1/[\s^2^(Fo^2^)+(0.0000P)^2^+22.3958P] where P=(Fo^2^+2Fc^2^)/3' 
_atom_sites_solution_primary      direct 
_atom_sites_solution_secondary    difmap 
_atom_sites_solution_hydrogens    geom 
_refine_ls_hydrogen_treatment     constr 
_refine_ls_extinction_method      none 
_refine_ls_extinction_coef        ? 
_refine_ls_number_reflns          1755 
_refine_ls_number_parameters      95 
_refine_ls_number_restraints      0 
_refine_ls_R_factor_all           0.0583 
_refine_ls_R_factor_gt            0.0574 
_refine_ls_wR_factor_ref          0.1495 
_refine_ls_wR_factor_gt           0.1491 
_refine_ls_goodness_of_fit_ref    1.452 
_refine_ls_restrained_S_all       1.452 
_refine_ls_shift/su_max           0.000 
_refine_ls_shift/su_mean          0.000 
  
loop_ 
 _atom_site_label 
 _atom_site_type_symbol 
 _atom_site_fract_x 
 _atom_site_fract_y 
 _atom_site_fract_z 
 _atom_site_U_iso_or_equiv 
 _atom_site_adp_type 
 _atom_site_occupancy 
 _atom_site_symmetry_multiplicity 
 _atom_site_calc_flag 
 _atom_site_refinement_flags 
 _atom_site_disorder_assembly 
 _atom_site_disorder_group 
C1 C 0.462(2) 0.5824(17) 0.1575(3) 0.0173(19) Uani 1 1 d . . . 
C3 C 0.305(3) 0.3802(17) 0.1655(3) 0.019(2) Uani 1 1 d . . . 
H3 H 0.2693 0.3315 0.1950 0.023 Uiso 1 1 calc R . . 
C2 C 0.519(3) 0.6539(19) 0.1143(4) 0.024(2) Uani 1 1 d . . . 
H2 H 0.6293 0.7921 0.1092 0.028 Uiso 1 1 calc R . . 
C5 C 0.200(3) 0.2507(16) 0.1301(3) 0.021(2) Uani 1 1 d . . . 
H5 H 0.0896 0.1128 0.1353 0.025 Uiso 1 1 calc R . . 
C4 C 0.415(3) 0.5230(19) 0.0793(3) 0.023(2) Uani 1 1 d . . . 
H4 H 0.4524 0.5712 0.0499 0.027 Uiso 1 1 calc R . . 
C6 C 0.255(3) 0.3189(17) 0.0869(3) 0.019(2) Uani 1 1 d . . . 
C7 C 0.140(3) 0.1785(18) 0.0491(3) 0.022(2) Uani 1 1 d . . . 
I1 I 0.62853(15) 0.78336(11) 0.21025(2) 0.0188(2) Uani 1 1 d . . . 
O1 O 0.230(3) 0.2452(15) 0.0104(3) 0.037(2) Uani 1 1 d . . . 
H1 H 0.15(5) 0.15(3) -0.009(6) 0.08(6) Uiso 1 1 d . A 1 
O2 O -0.027(2) 0.0073(14) 0.0551(3) 0.0302(19) Uani 1 1 d . . . 
  
loop_ 
 _atom_site_aniso_label 
 _atom_site_aniso_U_11 
 _atom_site_aniso_U_22 
 _atom_site_aniso_U_33 
 _atom_site_aniso_U_23 
 _atom_site_aniso_U_13 
 _atom_site_aniso_U_12 
C1 0.013(4) 0.021(5) 0.019(5) 0.000(4) 0.003(3) 0.002(4) 
C3 0.025(5) 0.017(5) 0.017(5) 0.003(4) 0.005(4) -0.001(4) 
C2 0.023(5) 0.023(5) 0.025(5) 0.003(4) 0.003(4) -0.007(4) 
C5 0.029(5) 0.009(5) 0.025(5) 0.001(4) 0.003(4) -0.003(4) 
C4 0.027(5) 0.026(6) 0.016(5) 0.003(4) 0.003(4) -0.004(4) 
C6 0.023(5) 0.015(5) 0.020(5) 0.000(4) 0.003(4) -0.001(4) 
C7 0.029(5) 0.018(5) 0.020(5) 0.001(4) 0.002(4) -0.001(4) 
I1 0.0176(3) 0.0198(3) 0.0190(3) -0.0024(2) -0.0004(2) -0.0007(3) 
O1 0.061(6) 0.029(5) 0.020(4) -0.002(3) 0.007(4) -0.023(4) 
O2 0.046(5) 0.024(4) 0.021(4) -0.001(3) 0.002(3) -0.015(4) 
  
_geom_special_details 
; 
 All esds (except the esd in the dihedral angle between two l.s. planes) 
 are estimated using the full covariance matrix.  The cell esds are taken 
 into account individually in the estimation of esds in distances, angles 
 and torsion angles; correlations between esds in cell parameters are only 
 used when they are defined by crystal symmetry.  An approximate (isotropic) 
 treatment of cell esds is used for estimating esds involving l.s. planes. 
; 
  
loop_ 
 _geom_bond_atom_site_label_1 
 _geom_bond_atom_site_label_2 
 _geom_bond_distance 
 _geom_bond_site_symmetry_2 
 _geom_bond_publ_flag 
C1 C3 1.386(14) . ? 
C1 C2 1.395(14) . ? 
C1 I1 2.097(10) . ? 
C3 C5 1.381(14) . ? 
C3 H3 0.9500 . ? 
C2 C4 1.376(15) . ? 
C2 H2 0.9500 . ? 
C5 C6 1.389(14) . ? 
C5 H5 0.9500 . ? 
C4 C6 1.399(14) . ? 
C4 H4 0.9500 . ? 
C6 C7 1.486(14) . ? 
C7 O2 1.240(13) . ? 
C7 O1 1.294(13) . ? 
O1 H1 0.9(2) . ? 
  
loop_ 
 _geom_angle_atom_site_label_1 
 _geom_angle_atom_site_label_2 
 _geom_angle_atom_site_label_3 
 _geom_angle 
 _geom_angle_site_symmetry_1 
 _geom_angle_site_symmetry_3 
 _geom_angle_publ_flag 
C3 C1 C2 120.9(10) . . ? 
C3 C1 I1 120.3(7) . . ? 
C2 C1 I1 118.8(8) . . ? 
C5 C3 C1 119.0(9) . . ? 
C5 C3 H3 120.5 . . ? 
C1 C3 H3 120.5 . . ? 
C4 C2 C1 119.6(10) . . ? 
C4 C2 H2 120.2 . . ? 
C1 C2 H2 120.2 . . ? 
C3 C5 C6 121.0(9) . . ? 
C3 C5 H5 119.5 . . ? 
C6 C5 H5 119.5 . . ? 
C2 C4 C6 120.1(10) . . ? 
C2 C4 H4 119.9 . . ? 
C6 C4 H4 119.9 . . ? 
C5 C6 C4 119.4(9) . . ? 
C5 C6 C7 120.5(9) . . ? 
C4 C6 C7 120.1(9) . . ? 
O2 C7 O1 123.3(10) . . ? 
O2 C7 C6 121.0(9) . . ? 
O1 C7 C6 115.7(9) . . ? 
C7 O1 H1 108(10) . . ? 
  
loop_ 
 _geom_torsion_atom_site_label_1 
 _geom_torsion_atom_site_label_2 
 _geom_torsion_atom_site_label_3 
 _geom_torsion_atom_site_label_4 
 _geom_torsion 
 _geom_torsion_site_symmetry_1 
 _geom_torsion_site_symmetry_2 
 _geom_torsion_site_symmetry_3 
 _geom_torsion_site_symmetry_4 
 _geom_torsion_publ_flag 
C2 C1 C3 C5 -0.8(16) . . . . ? 
I1 C1 C3 C5 -179.5(8) . . . . ? 
C3 C1 C2 C4 0.6(16) . . . . ? 
I1 C1 C2 C4 179.3(8) . . . . ? 
C1 C3 C5 C6 0.8(16) . . . . ? 
C1 C2 C4 C6 -0.3(17) . . . . ? 
C3 C5 C6 C4 -0.5(16) . . . . ? 
C3 C5 C6 C7 -179.8(10) . . . . ? 
C2 C4 C6 C5 0.3(16) . . . . ? 
C2 C4 C6 C7 179.5(10) . . . . ? 
C5 C6 C7 O2 5.5(17) . . . . ? 
C4 C6 C7 O2 -173.7(11) . . . . ? 
C5 C6 C7 O1 -173.5(10) . . . . ? 
C4 C6 C7 O1 7.3(16) . . . . ? 
  
_diffrn_measured_fraction_theta_max    0.960 
_diffrn_reflns_theta_full              28.28 
_diffrn_measured_fraction_theta_full   0.960 
_refine_diff_density_max    3.777 
_refine_diff_density_min   -7.061 
_refine_diff_density_rms    0.298 
